# Supplementary material
Source: PubMed Central journal article supplement (PMC4820034)
Supplement: NIHMS67525-supplement-Table_S1.pdf [file NIHMS67525-supplement-Table_S1.pdf]

**Table S1 Mutagenic Primers**

---

| <b>ORF-UTR</b> | <b>Primers (restriction enzyme site introduced) 5' – 3'</b>                                                                           |
|----------------|---------------------------------------------------------------------------------------------------------------------------------------|
| ORF73-5' UTR   | <b>ovhv2-mir8-Site1</b> (PmeI)<br>F CCGACATCCCGGGACGTTTAAACGCAGCCGTCTGAGCCTTTTC<br>R GAAAAGGCTCAGACGGCTGCGTTTAAACGTCCCGGGATGTCGGG     |
| ORF73-5' UTR   | <b>ovhv2-mir8-Site2</b> (PmeI)<br>F CCTGAGCCTGCAGCCGTGTTTAAACTTTCTAAAAATTATGCCTTC<br>R GAAGGCATAATTTTTAGAAAAGTTTAAACACGGCTGCAGGCTCAGG |
| ORF50-3' UTR   | <b>ovhv2-mir5</b> (AscI)<br>F CCCAGAAATGTGACATGGCGCGCCCTTTTTTACTTGTGGTTTG<br>R CAAACCACAAGTAAAAAAGGGCGCGCCATGTCACATTTCTGGG            |
| ORF20-5' UTR   | <b>ovhv2-mir2</b> (PmeI)<br>F CACTGTTGTCCTCCTCGTTTAAACTTGGGCACGTCGTAGTCG<br>R CGACTACGACGTGCCCAAGTTTAAACGAGGAGGACAACAGTG              |

---

Underlined sequences represent the inserted restriction enzyme site.
